# Supplementary material
Source: MDPI journal article supplement (https://www.mdpi.com/2073-4352/12/4/550)
Supplement: s1 [file s1]

# Baloxavir marboxil polymorphs: Investigating the influence of molecule packing on the dissolution properties

Xinbo Zhou<sup>1</sup>, Kaxi Yu<sup>2</sup>, Jiyong Liu <sup>2</sup>, Zhiping Jin <sup>1</sup>and Xiurong Hu<sup>2</sup> \*

1 Zhejiang Jingxin Pharmaceutical Co., Ltd., Shaoxing 312500, China;

2 Department of Chemistry, Zhejiang University, Hangzhou 310027, China;

Table S1 Screening of BXM crystal form (Part of the experimental process)

| Solution evaporation studies                |                                       |                             |               |
|---------------------------------------------|---------------------------------------|-----------------------------|---------------|
| Starting form                               | Solvent sysytem                       | Evaporation temp. (°C)      | PXRD analysis |
| Form I                                      | ethyl acetate                         | 25, under reduced pressure  | I             |
| Form I                                      | Tetrahydrofuran                       | 25, under reduced pressure  | I+II          |
| Form I                                      | Acetonitrile                          | 25 , under reduced pressure | II            |
| Form I                                      | Dichloromethane                       | 25, under reduced pressure  | I+II          |
| Form I                                      | ethyl acetate- cyclohexane            | 25 , under reduced pressure | III           |
| Form I                                      | acetone                               | 25 , under reduced pressure | I             |
| Form I                                      | ethyl acetate                         | 25                          | I+II          |
| Cooling crystallization studies             |                                       |                             |               |
| Starting form                               | Solvent system                        | crystallization temp. (°C)  | PXRD analysis |
| Form I                                      | ethyl acetate                         | -20                         | III           |
| Form I                                      | ethyl acetate                         | 0                           | III           |
| Form I                                      | methanol                              | -10                         | I             |
| Form I                                      | methanol                              | 25                          | I             |
| Form I                                      | ethanol                               | 25                          | I             |
| Form I                                      | acetone                               | 25                          | I             |
| Form I                                      | n-propanol                            | 25                          | I             |
| Form I                                      | propan-2-ol                           | 25                          | I             |
| Form I                                      | Methanol-water (1:1)                  | 25                          | I             |
| Form I                                      | 1-Butanol                             | 25                          | I             |
| Form I                                      | 2-Butanol                             | 25                          | I             |
| Form I                                      | Methyl isobutyl ketone                | 25                          | I             |
| Form I                                      | Acetonitrile-n-heptane(3:7)           | 25                          | II            |
| Form I                                      | acetone-water (1:1)                   | 25                          | I             |
| Form I                                      | dimethylbenzene                       | 25                          | I             |
| Solvent /anti-solvent precipitation studies |                                       |                             |               |
| Starting form                               | Solvent /anti-solvent                 | temp. (°C)                  | PXRD analysis |
| Form I                                      | Acetonitrile / water                  | 25                          | I             |
| Form I                                      | Acetic Acid / methyl tert-butyl ether | 25                          | I             |
| Form I                                      | Acetic Acid / water                   | 25                          | I             |

|                       |                             |                          |               |
|-----------------------|-----------------------------|--------------------------|---------------|
| Form I                | ethyl acetate/ cyclohexane  | 25                       | I             |
| Form I                | Acetonitrile / n-heptane    | 0                        | II            |
| Form I                | 1,4-Dioxane/ water          | 25                       | I             |
| Form I                | Acetic Acid / n-heptane     | 25                       | I             |
| Form I                | Tetrahydrofuran / n-heptane | 0                        | II            |
| Equilibration studies |                             |                          |               |
| Starting form         | Solvent system              | Equilibration temp. (°C) | PXRD analysis |
| Form I                | water                       | 25                       | I             |
| Form II               | water                       | 25                       | II            |
| Form III              | water                       | 25                       | I             |

**Table S2** Hydrogen Bonds geometry (Å, °) for Form I.

|                           |             |               |                       |                         |
|---------------------------|-------------|---------------|-----------------------|-------------------------|
| <i>D</i> —H... <i>A</i>   | <i>D</i> —H | H... <i>A</i> | <i>D</i> ... <i>A</i> | <i>D</i> —H... <i>A</i> |
| C7—H7B...O4 <sup>1</sup>  | 0.97        | 2.50          | 3.077(3)              | 118                     |
| C11—H11...F1 <sup>2</sup> | 0.93        | 2.52          | 3.207(3)              | 130                     |

<sup>1</sup>-1+X,+Y,-1+Z; <sup>2</sup>1+X,+Y,1+Z

**Table S3** Hydrogen-bond geometry (Å, °) for Form II

|                                |             |               |                       |                         |
|--------------------------------|-------------|---------------|-----------------------|-------------------------|
| <i>D</i> —H... <i>A</i>        | <i>D</i> —H | H... <i>A</i> | <i>D</i> ... <i>A</i> | <i>D</i> —H... <i>A</i> |
| C4A—H4A...S1A <sup>i</sup>     | 0.95        | 2.80          | 3.716 (7)             | 162                     |
| C11A—H11A...F1A <sup>ii</sup>  | 0.95        | 2.51          | 3.091 (8)             | 120                     |
| C4B—H4B...S1B <sup>i</sup>     | 0.95        | 2.79          | 3.717 (7)             | 164                     |
| C11B—H11B...F1B <sup>iii</sup> | 0.95        | 2.41          | 3.116 (8)             | 131                     |
| C27B—H27E...O5A <sup>iii</sup> | 0.98        | 2.51          | 3.339 (14)            | 142                     |

Symmetry codes: (i) *x*+1, *y*, *z*; (ii) *x*, *y*, *z*-1; (iii) *x*+1, *y*, *z*+1.

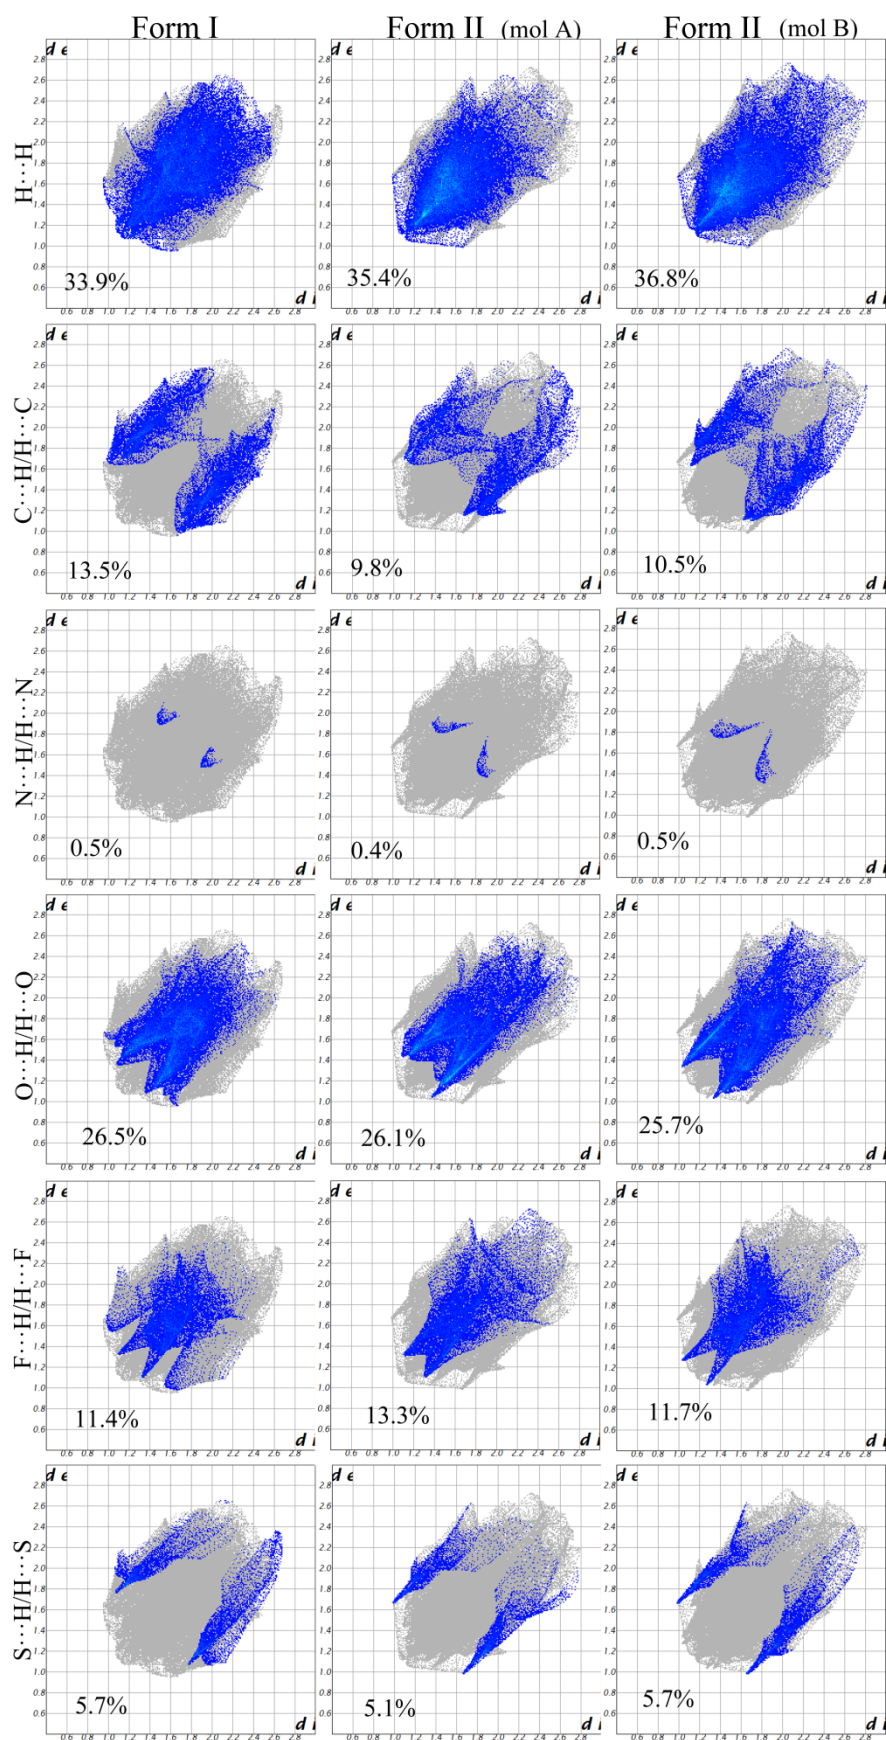

**Figure S1** 2D fingerprint plots of the Hirshfeld surfaces for components of BXM Form I and II.

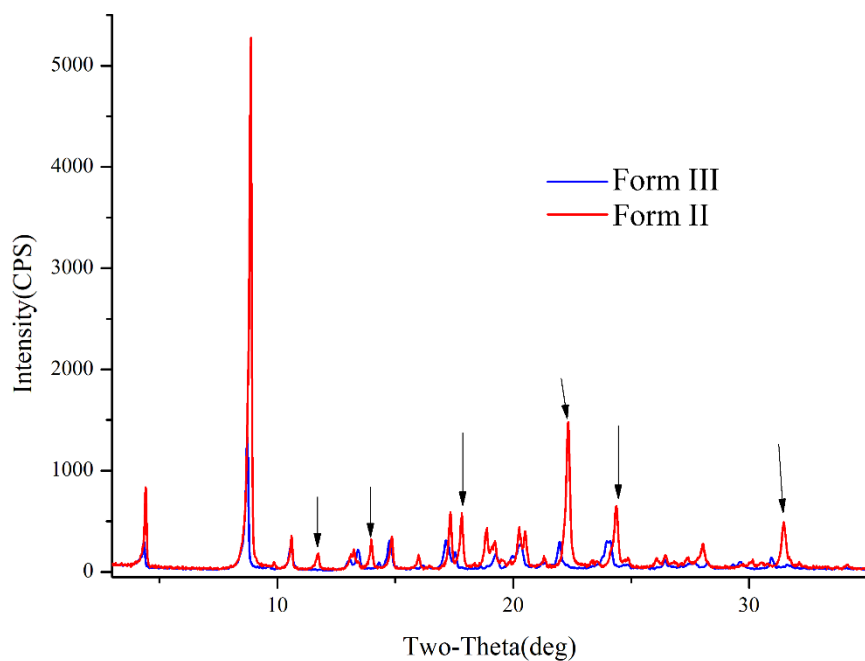

**Figure S2** Showing the comparison of observed PXRD patterns of Form II and III. The variations in peak positions across the polymorphs are pointed by the arrows.

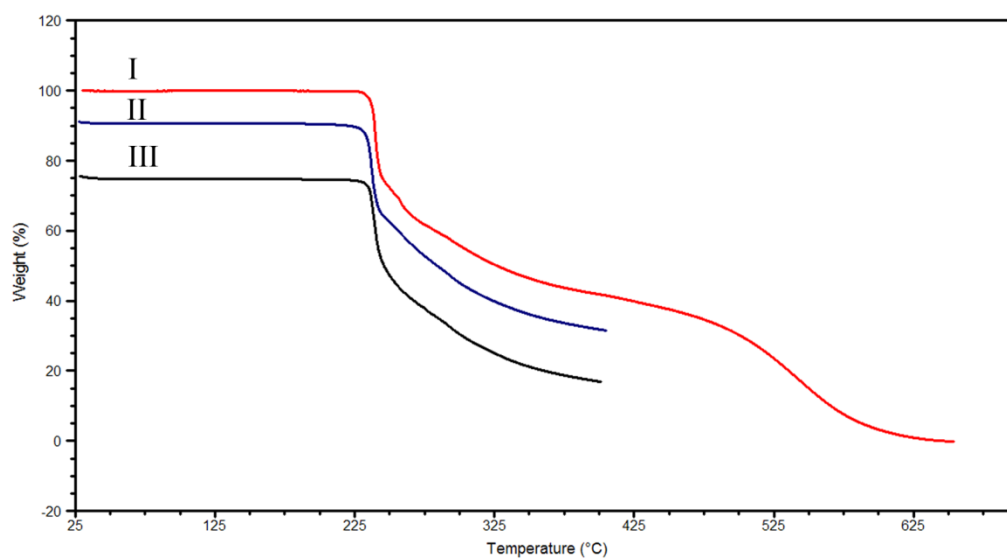

**Figure S3** TG curves of BXM in I, II and III at a 10 °C/min heating rate.

**Table S4.** Morphology Predictions for Form I and II by Means of BFDH and GM Calculations.

| h k l  | BFDH Morphology |         |              | Growth Morphology |              |
|--------|-----------------|---------|--------------|-------------------|--------------|
|        | Multiplicity    | D (hkl) | % Total area | Eatt (Total)      | % Total area |
| Form I |                 |         |              |                   |              |
| 0 -2 0 | 1               | 10.098  | 32.5         | -47.906           | 35.2         |
| 0 0 1  | 2               | 8.969   | 16.8         | -51.462           | 21.0         |

|              |   |        |      |          |      |
|--------------|---|--------|------|----------|------|
| 0 -1 1       | 2 | 8.197  | 17.7 | -59.884  | 12.1 |
| 1 0 0        | 2 | 6.727  | 9.4  | -69.820  | 16.0 |
| 1 0 -1       | 2 | 6.493  | 7.5  | -68.486  | 14.4 |
| 1 -1 0       | 2 | 6.382  | 9.1  | -        |      |
| 1 -1 -1      | 2 | 6.181  | 7.0  | -78.515  | 1.4  |
| Aspect ratio |   | 1.778  |      | 1.835    |      |
| Form II      |   |        |      |          |      |
| 0 -2 0       | 1 | 19.655 | 54.1 | -31.244  | 61.9 |
| 0 0 1        | 2 | 9.133  | 11.6 | -89.143  | 13.8 |
| 0 -1 1       | 2 | 8.896  | 11.8 | -92.006  | 5.2  |
| 1 0 0        | 2 | 6.630  | 5.8  | -122.566 | 5.9  |
| 1 0 -1       | 2 | 6.605  | 5.6  | -117.703 | 9.5  |
| 1 -1 0       | 2 | 6.538  | 5.7  | -124.306 | 3.1  |
| 1 -1 -1      | 2 | 6.514  | 5.5  | -120.936 | 0.6  |
| Aspect ratio |   | 3.254  |      | 4.270    |      |

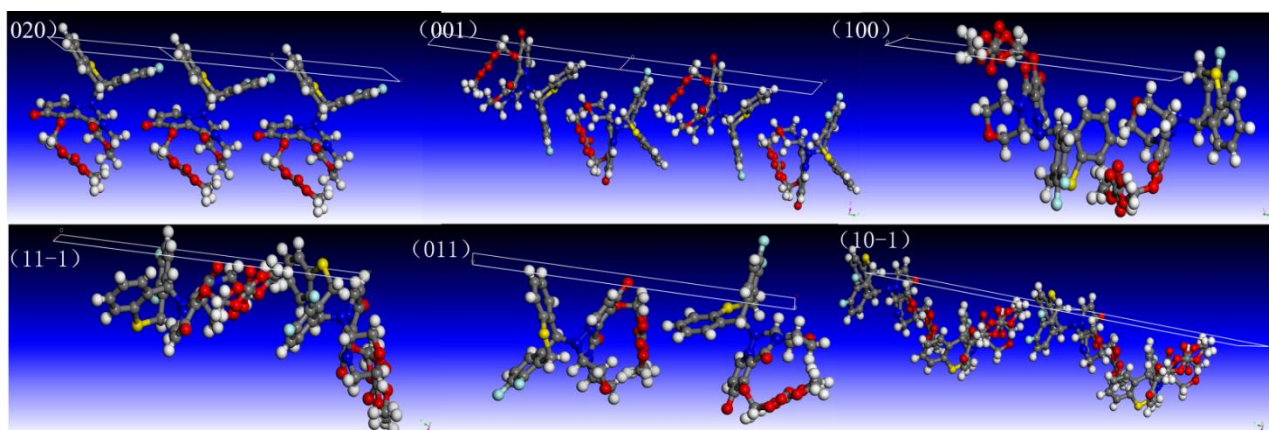

**Figure S4.** Crystal slices of different facets of BXM Form I expressing the presence of functional groups. The most dominant facet (020) is covered by 1 phenyl, and second dominant facet (001) is covered by 1 carbonyl.

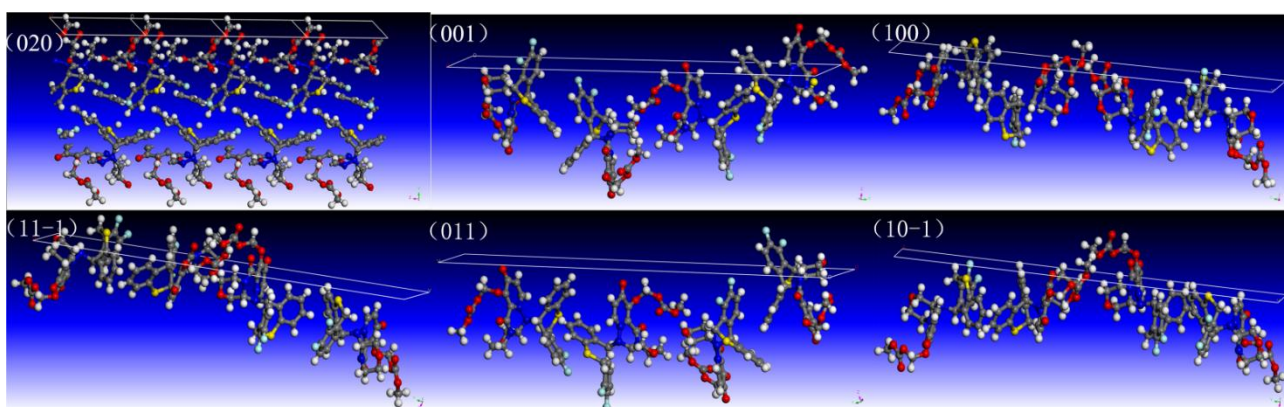

**Figure S5.** Crystal slices of different facets of BXM Form II expressing the presence of functional groups. The most dominant facet (020) is covered by 1 methoxyl, and second dominant facet (001) is covered by 2 fluorines, 2 carbonyl and 1 methymethyl carbonate chain.



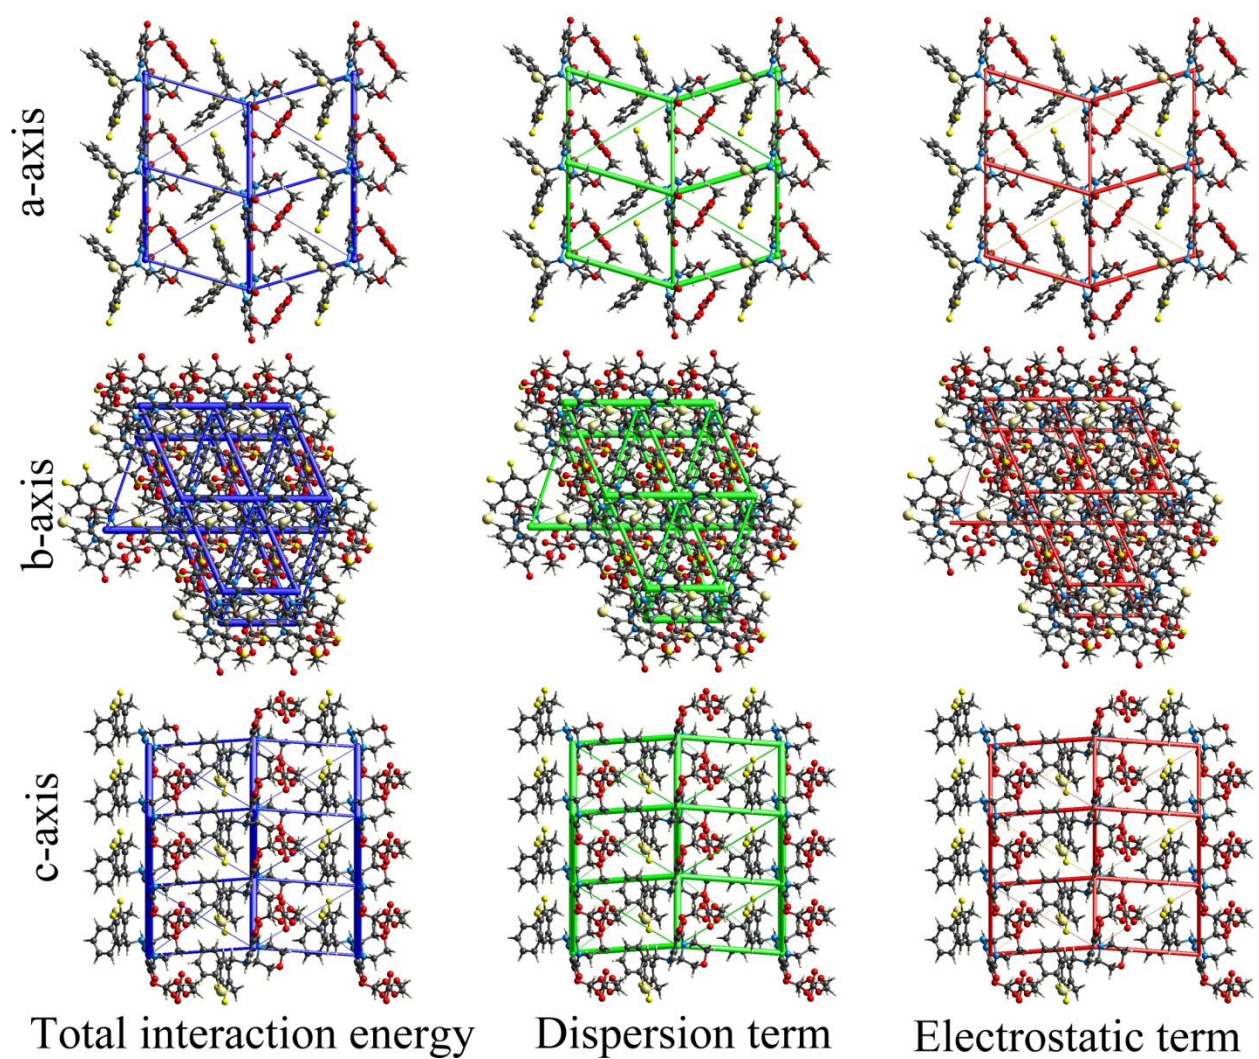

**Figure S6.** Energy frameworks corresponding to the different energy components and the total interaction energy in BXM Form I.

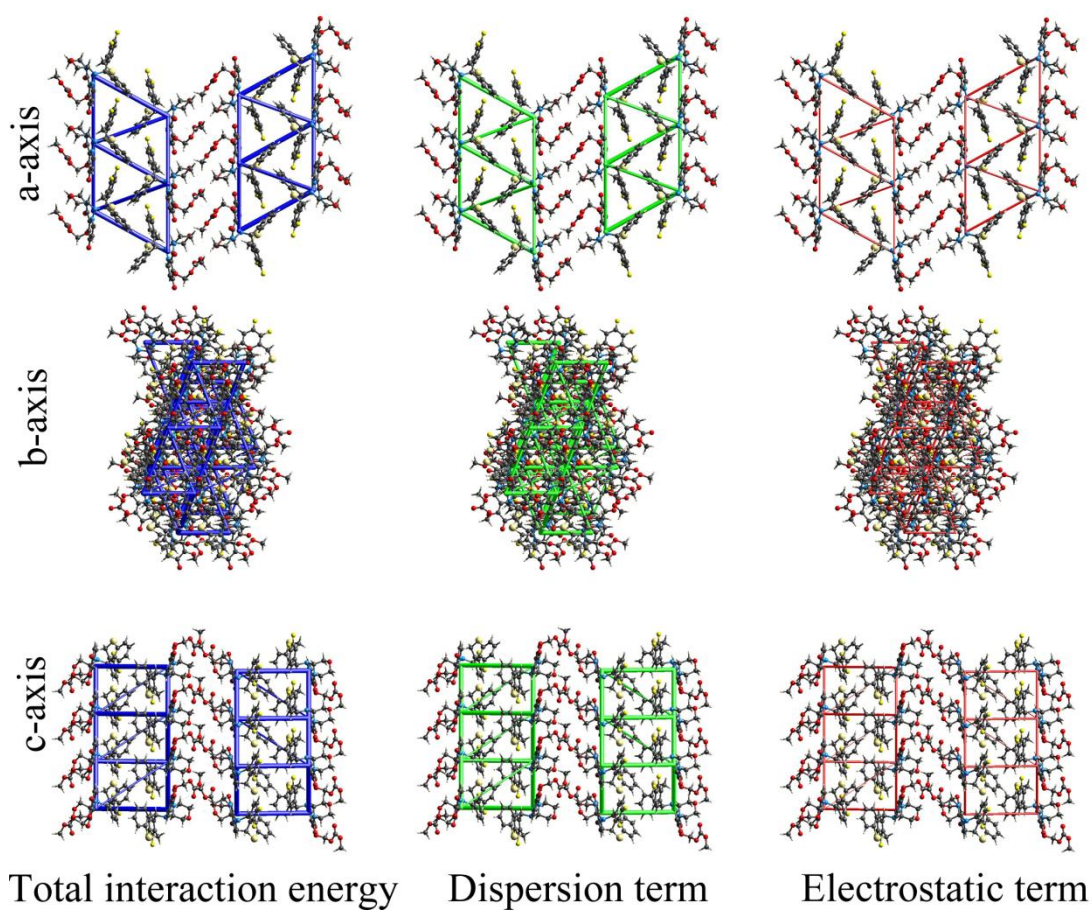

**Figure S7.** Energy frameworks corresponding to the different energy components and the total interaction energy in BXM Form II.

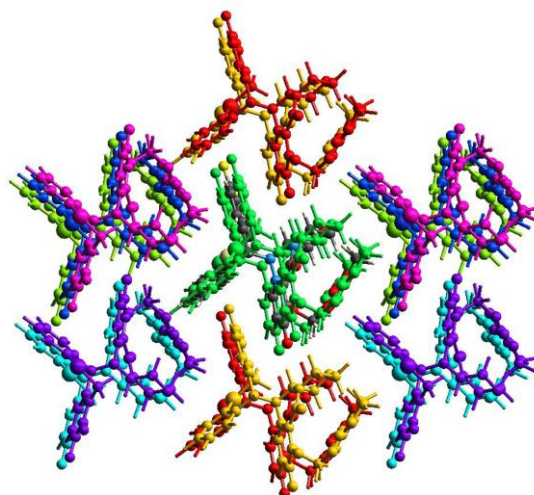

**Figure S8** Color coding for the neighboring molecules around molecule of BXM Form I. The molecule is shown with atom type color.

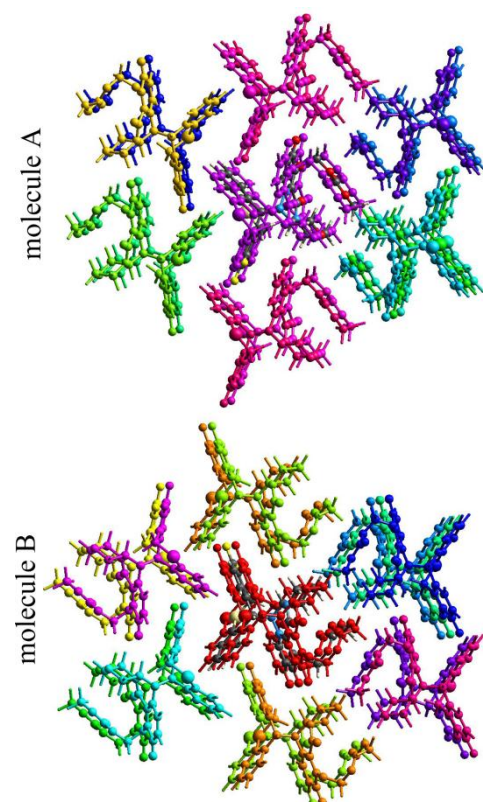

**Figure S9:** Color coding for the neighboring molecules around molecule A (top) and molecule B (bottom) of BXM Form II. The molecules are shown with atom type color.



**Table S5** Molecular pairs and the interaction energies (kJ/mole) obtained from energy framework calculation for BXM Form I.

| Interaction Energies (kJ/mol)                                                                                                                                       |   |               |       |                  |       |       |        |       |       |
|---------------------------------------------------------------------------------------------------------------------------------------------------------------------|---|---------------|-------|------------------|-------|-------|--------|-------|-------|
| R is the distance between molecular centroids (mean atomic position) in Å.                                                                                          |   |               |       |                  |       |       |        |       |       |
| Total energies, only reported for two benchmarked energy models, are the sum of the four energy components, scaled appropriately (see the scale factor table below) |   |               |       |                  |       |       |        |       |       |
|                                                                                                                                                                     | N | Symop         | R     | Electron Density | E_ele | E_pol | E_dis  | E_rep | E_tot |
|                                                                                                                                                                     | 2 | x, y, z       | 9.49  | B3LYP/6-31G(d,p) | -5.4  | -3.6  | -35.2  | 21.3  | -25.9 |
|                                                                                                                                                                     | 2 | x, y, z       | 9.83  | B3LYP/6-31G(d,p) | -29.3 | -7.3  | -51.7  | 33.9  | -60.5 |
|                                                                                                                                                                     | 2 | -x, y+1/2, -z | 12.27 | B3LYP/6-31G(d,p) | -1.1  | -0.3  | -6.0   | 0.2   | -6.5  |
|                                                                                                                                                                     | 2 | x, y, z       | 7.12  | B3LYP/6-31G(d,p) | -35.7 | -10.8 | -87.9  | 77.3  | -74.6 |
|                                                                                                                                                                     | 2 | -x, y+1/2, -z | 12.04 | B3LYP/6-31G(d,p) | 3.6   | -1.7  | -15.6  | 6.1   | -7.3  |
|                                                                                                                                                                     | 2 | -x, y+1/2, -z | 10.52 | B3LYP/6-31G(d,p) | -40.6 | -10.7 | -66.5  | 130.7 | -28.0 |
|                                                                                                                                                                     | 2 | -x, y+1/2, -z | 12.73 | B3LYP/6-31G(d,p) | 3.8   | -1.1  | -14.0  | 4.3   | -6.4  |
|                                                                                                                                                                     | 2 | -x, y+1/2, -z | 13.11 | B3LYP/6-31G(d,p) | -3.3  | -0.7  | -4.5   | 0.7   | -7.6  |
| Scale factors for benchmarked energy models                                                                                                                         |   |               |       |                  |       |       |        |       |       |
| See Mackenzie et al. IUCrJ (2017)                                                                                                                                   |   |               |       |                  |       |       |        |       |       |
| Energy Model                                                                                                                                                        |   |               |       |                  | k_ele | k_pol | k_disp | k_rep |       |
| CE-HF ... HF/3-21G electron densities                                                                                                                               |   |               |       |                  | 1.019 | 0.651 | 0.901  | 0.811 |       |
| CE-B3LYP ... B3LYP/6-31G(d,p) electron densities                                                                                                                    |   |               |       |                  | 1.057 | 0.740 | 0.871  | 0.618 |       |

molecule A                      molecule B

## Overall Energy Profile

Interaction Energies (kJ/mol)

R is the distance between molecular centroids (mean atomic position) in Å

Total energies, only reported for two benchmarked energy models, are the sum of the four energy components, scaled appropriately (see the scale factor table below)

|            | M | Symop   | R     | Electron Density | E <sub>ele</sub> | E <sub>pol</sub> | E <sub>dis</sub> | E <sub>rep</sub> | E <sub>tot</sub> |
|------------|---|---------|-------|------------------|------------------|------------------|------------------|------------------|------------------|
| Red        | 0 | x, y, z | 7.10  | BSLIP/6-31G(d,p) | -29.3            | -10.0            | -70.9            | 52.2             | -67.9            |
|            | 0 | x, y, z | 9.82  | BSLIP/6-31G(d,p) | -22.7            | -7.0             | -46.9            | 30.4             | -51.3            |
| Orange     | 1 | -       | 11.93 | BSLIP/6-31G(d,p) | 0.0              | 0.0              | 0.0              | 0.0              | 0.0              |
|            | 0 | x, y, z | 9.78  | BSLIP/6-31G(d,p) | 0.0              | 0.0              | 0.0              | 0.0              | 0.0              |
| Green      | 1 | -       | 13.04 | BSLIP/6-31G(d,p) | -9.3             | -4.9             | -31.2            | 23.4             | -26.2            |
|            | 1 | -       | 10.34 | BSLIP/6-31G(d,p) | -0.0             | -0.0             | -0.0             | 0.0              | 0.0              |
| Blue       | 1 | -       | 10.38 | BSLIP/6-31G(d,p) | -22.7            | -7.0             | -46.9            | 30.4             | -51.3            |
|            | 1 | -       | 12.28 | BSLIP/6-31G(d,p) | -0.0             | -0.0             | -0.0             | 0.0              | 0.0              |
| Purple     | 1 | -       | 12.81 | BSLIP/6-31G(d,p) | -0.1             | -0.0             | -0.1             | 0.0              | -0.1             |
|            | 1 | -       | 12.31 | BSLIP/6-31G(d,p) | -0.1             | -0.0             | -0.1             | 0.0              | -0.1             |
| Dark Blue  | 1 | -       | 11.39 | BSLIP/6-31G(d,p) | -29.3            | -10.0            | -70.9            | 52.2             | -67.9            |
|            | 1 | -       | 12.61 | BSLIP/6-31G(d,p) | -0.1             | -0.0             | -0.1             | 0.0              | -0.2             |
| Pink       | 2 | x, y, z | 7.10  | BSLIP/6-31G(d,p) | -29.3            | -10.0            | -70.9            | 52.2             | -67.9            |
|            | 2 | x, y, z | 9.82  | BSLIP/6-31G(d,p) | -22.7            | -7.0             | -46.9            | 30.4             | -51.3            |
| Light Pink | 2 | x, y, z | 9.78  | BSLIP/6-31G(d,p) | -9.3             | -4.9             | -31.2            | 23.4             | -26.2            |

Scale factors for benchmarked energy models

See Machenzin et al. IUCrJ (2017)

| Energy Model                                     | k <sub>ele</sub> | k <sub>pol</sub> | k <sub>dis</sub> | k <sub>rep</sub> |
|--------------------------------------------------|------------------|------------------|------------------|------------------|
| CE-HF ... HF/3-21G electron densities            | 1.019            | 0.651            | 0.901            | 0.811            |
| CE-BSLIP ... BSLIP/6-31G(d,p) electron densities | 1.057            | 0.740            | 0.871            | 0.618            |

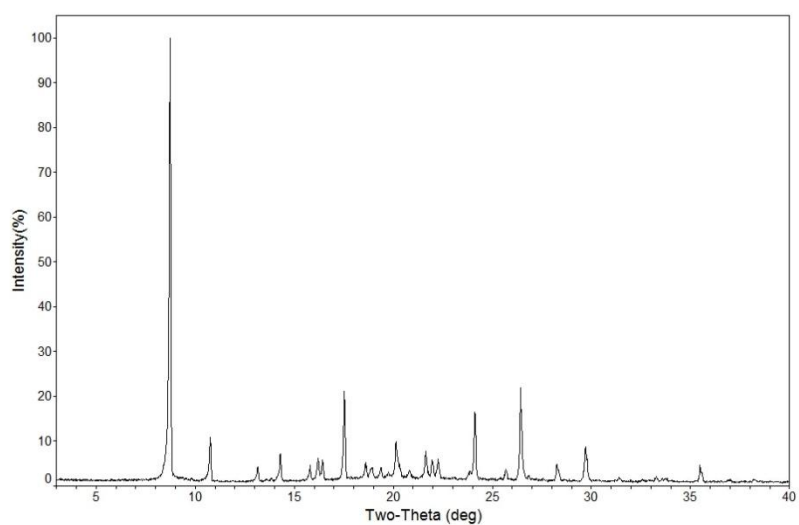

**Figure S10** The PXRD pattern of the source BXM

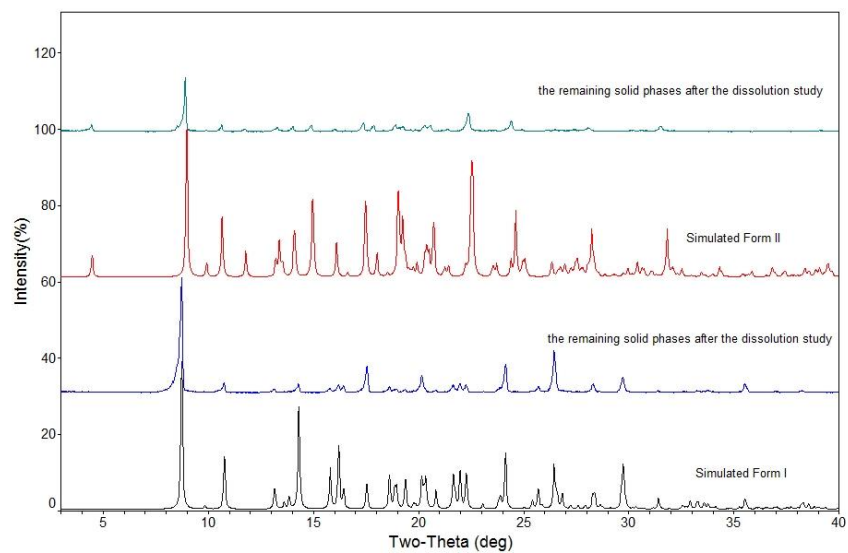

**Figure S10** The PXRD pattern of the remaining solid phases after the dissolution study and the simulated PXRD patterns of the BXM Form I and II.

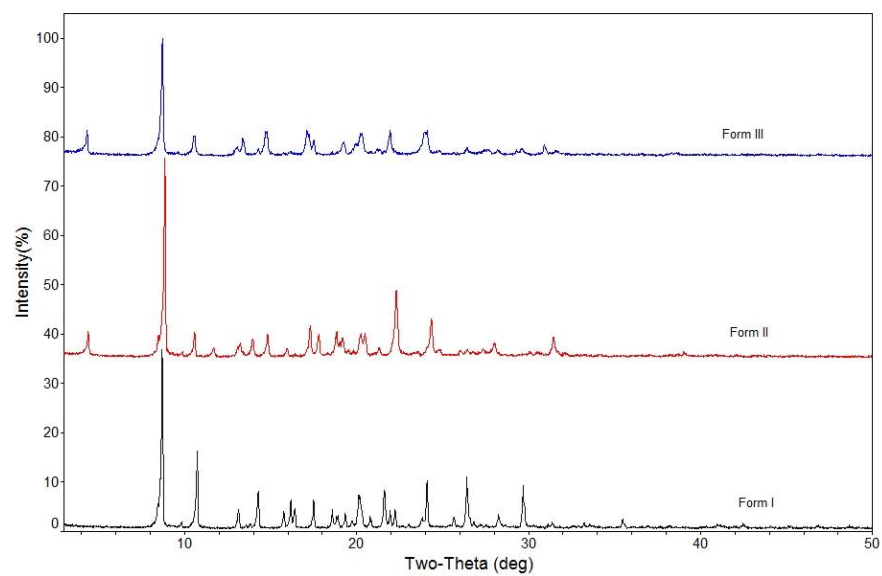

**Figure S11** Stability of Form I, Form II and Form III after storage of 12 months at  $25^{\circ}\text{C} \pm 2^{\circ}\text{C}$  and  $60\% \text{ RH} \pm 5\% \text{ R}$  shown in the PXRD pattern.
